# Supplementary material
Source: HighWire-hosted journal article supplement (https://bibliotheek.ehb.be/content/7/1/e000891)
Supplement: inline-supplementary-material-2 [file inline-supplementary-material-2.pdf]

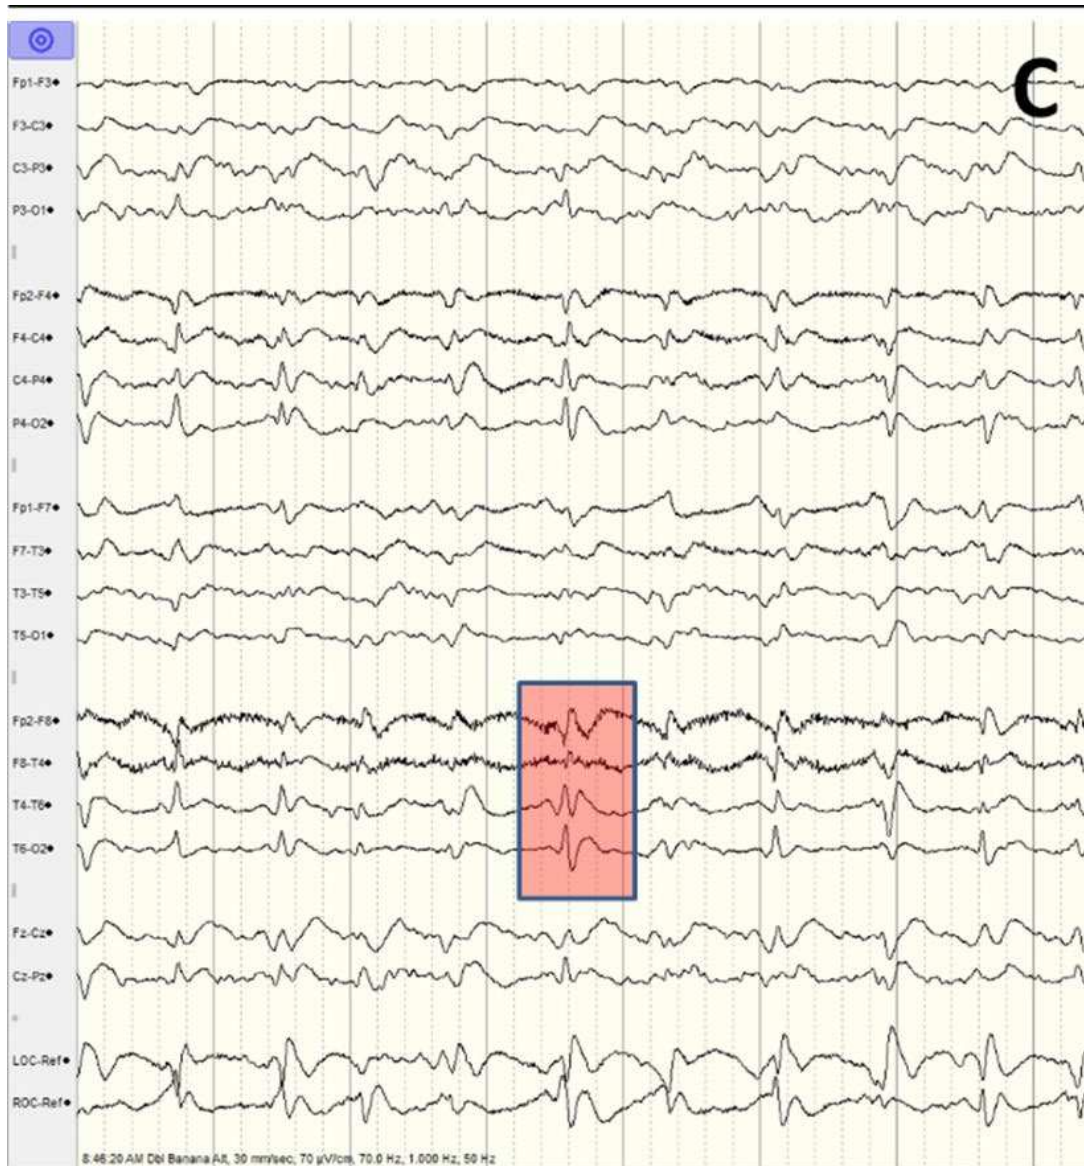**Supplemental Figure 2:**

Standard EEG tracing showing asymmetrical large amplitude triphasic discharges
