# Supplementary material
Source: HighWire-hosted journal article supplement (https://bibliotheek.ehb.be/content/7/1/e000891)
Supplement: inline-supplementary-material-3 [file inline-supplementary-material-3.pdf]

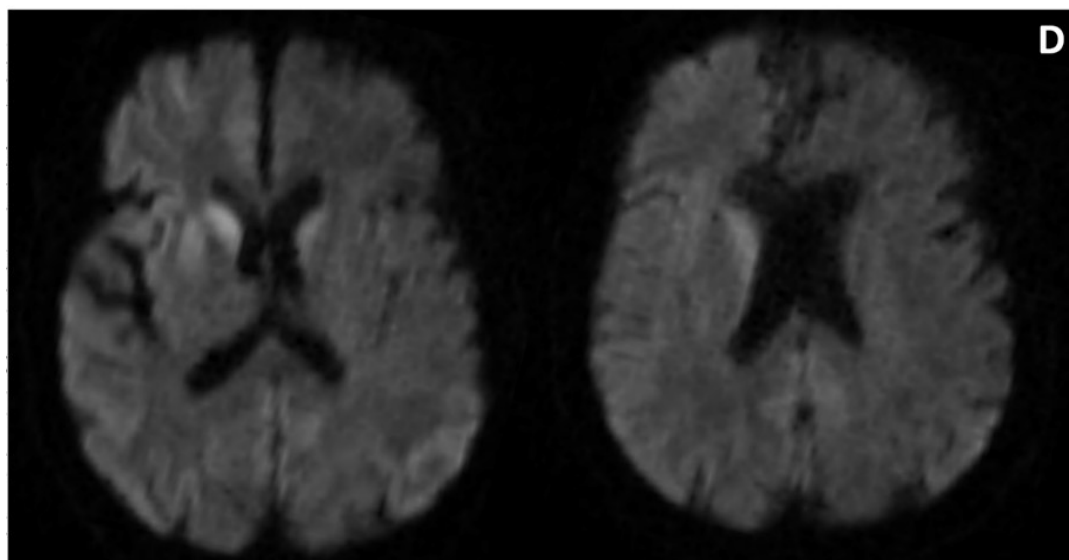**Supplemental Figure 3:**

Axial MRI DWI brain shows signal hyperintensity at right striatum and thalami
