# Supplementary material
Source: HighWire-hosted journal article supplement (https://bibliotheek.ehb.be/content/7/1/e000891)
Supplement: inline-supplementary-material-4 [file inline-supplementary-material-4.pdf]

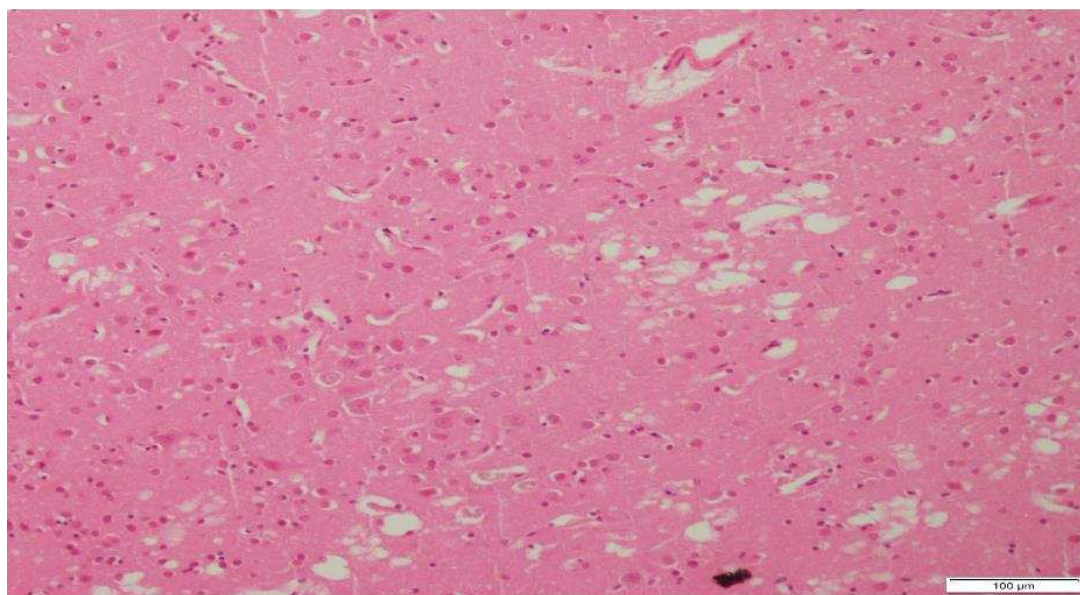

**Supplemental figure 4:** H&E section of left temporal lobe (magnification x100) demonstrating microvacuolar and perivascular spongiform changes.
